# Supplementary material for: Optimizing chlorine dioxide treatment for enhanced post-harvest storage quality of Toona Sinensis
Source: PeerJ. 2024 Nov 5;12:e18346. doi: 10.7717/peerj.18346 (PMC11546140; doi:10.7717/peerj.18346)
Supplement: Supplemental Information 1 [file peerj-12-18346-s001.xlsx]

## Sheet: Sensibility
0d			2d																		Storage time/d	CK	S1	S2	S3	S4
																					0	100	100	100	100	100
																					2
																					4
																					6
																					8
																					18
				Introduction：CK→S1...→S4											Storage time/d	CK				S1				S2				S3				S4
			4d												0	100	100	100	100	100	100	100	100	100	100	100	100	100	100	100	100	100	100	100	100
															2	92	91	89	90.6667	92	93	91	92	92	90	90	90.6667	92	93	89	91.3333	91	89	90	90
															4	81	79	83	81	82	85	84	83.6667	84	83	84	83.6667	84	83	85	84	80	83	82	81.6667
															6	75	74	73	74	77	76	79	77.3333	76	78	77	77	79	76	76	77	74	73	75	74
															8	62	61	62	61.6667	68	70	72	70	71	70	70	70.3333	67	68	69	68	62	64	62	62.6667
															14	50	47	49	48.6667	58	58	56	57.3333	61	60	62	61	60	59	58	59	50	52	53	51.6667
			6d											Concentration	Storage time/d
														A1	B1	92	91	89
															B2	81	79	83
															B3	75	74	73
															B4	62	61	62
															B5	50	47	49
														A2	B1	92	93	91
															B2	82	85	84
			8d												B3	77	76	79
															B4	68	70	72
															B5	58	58	56
														A3	B1	92	90	90
															B2	84	83	84
															B3	76	78	77
															B4	71	70	70
															B5	61	60	62
														A4	B1	92	93	89
			14d												B2	84	83	85
															B3	79	76	76
															B4	67	68	69
															B5	60	59	58
														A5	B1	91	89	90
															B2	80	83	82
															B3	74	73	75
															B4	62	64	62
															B5	50	52	53

## Sheet: Weight Loss rate
	Storage time/d	CK			S1			S2			S3			S4
	0	0	0	0	0	0	0	0	0	0	0	0	0	0	0	0
	2	1.02	1.45	1.72	0.99	1.21	1.51	1.23	1.55	1.32	1.29	1.43	1.33	1.79	1.02	1.23
	4	2.34	2.54	2.95	2.67	2.21	2.77	2.24	2.03	2.41	1.95	1.67	2.33	2.34	2.43	2.45
	6	3.79	4.86	3.58	3.29	4.38	4.23	3.02	2.89	3.2	2.56	2.43	2.56	3.46	3.55	3.54
	8	5.45	5.58	5.72	5.23	4.78	4.13	3.57	4.04	3.69	3.18	3.23	3.59	4.27	4.26	4.29
	18	8.43	8.76	7.56	8.34	7.16	7.57	6.28	6.25	6.29	5.74	5.34	5.13	7.36	7.45	8.28
Concentration	Storage time/d				Av. Value
A1	B1	1.02	1.45	1.72	1.39667
	B2	2.34	2.54	2.95	2.61
	B3	3.79	4.86	3.58	4.07667
	B4	5.45	5.58	5.72	5.58333
	B5	8.43	8.76	7.56	8.25
A2	B1	0.99	1.21	1.51	1.23667
	B2	2.67	2.21	2.77	2.55
	B3	3.29	4.38	4.23	3.96667
	B4	5.23	4.78	4.13	4.71333
	B5	8.34	7.16	7.57	7.69
A3	B1	1.23	1.55	1.32	1.36667
	B2	2.24	2.03	2.41	2.22667
	B3	3.02	2.89	3.2	3.03667
	B4	3.57	4.04	3.69	3.76667
	B5	6.28	6.25	6.29	6.27333
A4	B1	1.29	1.43	1.33	1.35
	B2	1.95	1.67	2.33	1.98333
	B3	2.56	2.43	2.56	2.51667
	B4	3.18	3.23	3.59	3.33333
	B5	5.74	5.34	5.13	5.40333
A5	B1	1.79	1.02	1.23	1.34667
	B2	2.34	2.43	2.45	2.40667
	B3	3.46	3.55	3.54	3.51667
	B4	4.27	4.26	4.29	4.27333
	B5	7.36	7.45	8.28	7.69667

## Sheet: Total flavonoids
									Calculation: Total total flavonoids in 1.0 ml sample after sonication mg/ml = (absorbance value + 0.0882)/0.0862
2d		Storage time/d	CK			S1			S2			S3			S4
		0	8.47795	9.82581	9.82581	8.47795	9.82581	9.82581	8.47795	9.82581	9.82581	8.47795	9.82581	9.82581	8.47795	9.82581	9.82581
		2	8.06881	7.68767	7.68767	8.00048	6.15786	6.15786	9.83943	7.91534	7.91534	8.00764	7.95702	7.95702	7.70797	7.69569	7.69569
		4	7.84742	7.48089	7.48089	7.72627	8.09292	8.09292	9.16993	9.21095	9.21095	7.87552	8.21418	8.21418	7.10298	6.89421	6.89421
		6	7.32593	6.79905	6.79905	6.61128	7.20915	7.20915	9.81989	8.31415	8.31415	7.96873	7.88671	7.88671	6.70143	6.94672	6.94672
		8	6.64127	5.50735	5.50735	5.33205	4.27106	4.27106	8.1281	8.59026	8.59026	7.74595	6.39934	6.39934	7.09975	5.4308	5.4308
		18	3.64	3.32	3.01	5.64	4.35	5.42	5.79	5.29	6.38	5.34	5.83	4.36	4.8	4.85	4.48
4d		Concentration	Storage time/d
		A1	B1	8.06881	7.68767	7.68767
			B2	7.84742	7.48089	7.48089
			B3	7.32593	6.79905	6.79905
			B4	6.64127	5.50735	5.50735
			B5	3.64	3.32	3.01
		A2	B1	8.00048	6.15786	6.15786
			B2	7.72627	8.09292	8.09292
			B3	6.61128	7.20915	7.20915
			B4	5.33205	4.27106	4.27106
6d			B5	5.64	4.35	5.42
		A3	B1	9.83943	7.91534	7.91534
			B2	9.16993	9.21095	9.21095
			B3	9.81989	8.31415	8.31415
			B4	8.1281	8.59026	8.59026
			B5	5.79	5.29	6.38
		A4	B1	8.00764	7.95702	7.95702
			B2	7.87552	8.21418	8.21418
			B3	7.96873	7.88671	7.88671
			B4	7.74595	6.39934	6.39934
8d			B5	5.34	5.83	4.36
		A5	B1	7.70797	7.69569	7.69569
			B2	7.10298	6.89421	6.89421
			B3	6.70143	6.94672	6.94672
			B4	7.09975	5.4308	5.4308
			B5	4.8	4.85	4.48
18d

## Sheet: Vc
VBlank①=0.11	VBand①=3.0	TitrityT=0.034mg/mL
VBlank②=0.1	VBand②=3.05
VBlank③=0.1	VBand③=3.10
		Sample sizem（g）	VcConsumption（mL）	Vc Content（mg/100g）	Av. Value
0 Day sample	①	1.0095	0.35	42.1	42.1964		Storage time/d	CK				S1				S2				S3				S4
	②	1.0045	0.35	42.3096			0	42.1	42.3096	42.1794	42.1964	42.1	42.3096	42.1794	42.1964	42.1	42.3096	42.1794	42.1964	42.1	42.3096	42.1794	42.1964	42.1	42.3096	42.1794	42.1964
	③	1.0076	0.35	42.1794			2	27.0701	25.4187	25.4111	25.9666	30.4872	33.9051	33.6734	32.6885	35.5471	37.1991	35.6181	36.1215	33.6734	33.6901	35.5118	34.2917	27.0002	25.4415	27.019	26.4869
2 D sample	ck①	1.0048	0.26	27.0701	25.9666		4	18.6274	21.9769	18.5811	19.7285	23.7596	23.6158	22.0251	23.1335	25.3077	25.4389	23.6722	24.8063	16.9356	25.2876	27.1078	23.1104	18.6422	23.6769	22.0493	21.4561
	ck②	1.0032	0.25	25.4187			6	8.10064	10.1675	8.44427	8.90412	13.5593	11.8079	13.468	12.9451	18.6162	20.2642	21.9094	20.2633	20.3776	18.6552	20.3288	19.7872	20.3532	20.3309	16.8936	19.1925
	ck③	1.0035	0.25	25.4111			8	5.08677	6.77696	5.05101	5.63825	6.74871	8.45939	6.78372	7.33061	6.73467	16.8919	13.468	12.3649	10.1321	8.47965	11.8467	10.1528	6.77696	6.77899	5.08373	6.21323
	S1①	1.0037	0.28	30.4872	32.6885		14	3.367	5.06606	3.39186	3.94164	6.76954	5.08272	6.77899	6.21041	6.77831	8.42669	8.49066	7.89855	8.42251	8.47458	6.74737	7.88149	5.05051	3.38477	6.75474	5.06334
	S1②	1.0028	0.3	33.9051
	S1③	1.0097	0.3	33.6734
	S2①	1.0043	0.31	35.5471	36.1215
	S2②	1.0054	0.32	37.1991
	S2③	1.0023	0.31	35.6181			Concentration	Storage time/d
	S3①	1.0097	0.3	33.6734	34.2917		A1	B1	27.0701	25.4187	25.4111
	S3②	1.0092	0.3	33.6901				B2	18.6274	21.9769	18.5811
	S3③	1.0053	0.31	35.5118				B3	8.10064	10.1675	8.44427
	S4①	1.0074	0.26	27.0002	26.4869			B4	5.08677	6.77696	5.05101
	S4②	1.0023	0.25	25.4415				B5	3.367	5.06606	3.39186
	S4③	1.0067	0.26	27.019			A2	B1	30.4872	33.9051	33.6734
4 D sample	ck①	1.0039	0.21	18.6274	19.7285			B2	23.7596	23.6158	22.0251
	ck②	1.0056	0.23	21.9769				B3	13.5593	11.8079	13.468
	ck③	1.0064	0.21	18.5811				B4	6.74871	8.45939	6.78372
	S1①	1.0017	0.24	23.7596	23.1335			B5	6.76954	5.08272	6.77899
	S1②	1.0078	0.24	23.6158			A3	B1	35.5471	37.1991	35.6181
	S1③	1.0034	0.23	22.0251				B2	25.3077	25.4389	23.6722
	S2①	1.0076	0.25	25.3077	24.8063			B3	18.6162	20.2642	21.9094
	S2②	1.0024	0.25	25.4389				B4	6.73467	16.8919	13.468
	S2③	1.0054	0.24	23.6722				B5	6.77831	8.42669	8.49066
	S3①	1.0038	0.2	16.9356	23.1104		A4	B1	33.6734	33.6901	35.5118
	S3②	1.0084	0.25	25.2876				B2	16.9356	25.2876	27.1078
	S3③	1.0034	0.26	27.1078				B3	20.3776	18.6552	20.3288
	S4①	1.0031	0.21	18.6422	21.4561			B4	10.1321	8.47965	11.8467
	S4②	1.0052	0.24	23.6769				B5	8.42251	8.47458	6.74737
	S4③	1.0023	0.23	22.0493			A5	B1	27.0002	25.4415	27.019
6 D Sample	ck①	1.0493	0.15	8.10064	8.90412			B2	18.6422	23.6769	22.0493
	ck②	1.0032	0.16	10.1675				B3	20.3532	20.3309	16.8936
	ck③	1.0066	0.15	8.44427				B4	6.77696	6.77899	5.08373
	S1①	1.003	0.18	13.5593	12.9451			B5	5.05051	3.38477	6.75474
	S1②	1.0078	0.17	11.8079
	S1③	1.0098	0.18	13.468
	S2①	1.0045	0.21	18.6162	20.2633
	S2②	1.0067	0.22	20.2642
	S2③	1.0087	0.23	21.9094
	S3①	1.0011	0.22	20.3776	19.7872
	S3②	1.0024	0.21	18.6552
	S3③	1.0035	0.22	20.3288
	S4①	1.0023	0.22	20.3532	19.1925
	S4②	1.0034	0.22	20.3309
	S4③	1.0063	0.2	16.8936
8D Sample	ck①	1.0026	0.13	5.08677	5.63825
	ck②	1.0034	0.14	6.77696
	ck③	1.0097	0.13	5.05101
	S1①	1.0076	0.14	6.74871	7.33061
	S1②	1.0048	0.15	8.45939
	S1③	1.0024	0.14	6.78372
	S2①	1.0097	0.14	6.73467	12.3649
	S2②	1.0064	0.2	16.8919
	S2③	1.0098	0.18	13.468
	S3①	1.0067	0.16	10.1321	10.1528
	S3②	1.0024	0.15	8.47965
	S3③	1.0045	0.17	11.8467
	S4①	1.0034	0.14	6.77696	6.21323
	S4②	1.0031	0.14	6.77899
	S4③	1.0032	0.13	5.08373
18D Sample	ck①	1.0098	0.12	3.367	3.94164
	ck②	1.0067	0.13	5.06606
	ck③	1.0024	0.12	3.39186
	S1①	1.0045	0.14	6.76954	6.21041
	S1②	1.0034	0.13	5.08272
	S1③	1.0031	0.14	6.77899
	S2①	1.0032	0.14	6.77831	7.89855
	S2②	1.0087	0.15	8.42669
	S2③	1.0011	0.15	8.49066
	S3①	1.0092	0.15	8.42251	7.88149
	S3②	1.003	0.15	8.47458
	S3③	1.0078	0.14	6.74737
	S4①	1.0098	0.13	5.05051	5.06334
	S4②	1.0045	0.12	3.38477
	S4③	1.0067	0.14	6.75474

## Sheet: nitrite
Storage Time/d
0			Storage Time/d	CK				S1				S2				S3				S4
2			0	82.38	76.69	78.34	79.1367	82.38	76.69	78.34	79.1367	82.38	76.69	78.34	79.1367	82.38	76.69	78.34	79.1367	82.38	76.69	78.34	79.1367			Concentration	0	10	20	30	40	60	100	160
4			2	111.47	121.65	117.34	116.82	103.45	102.34	90.34	98.71	112.34	96.94	103.38	104.22	94.39	99.67	94.92	96.3267	103.25	106.49	107.45	105.73			Absorbance	0	0.155	0.294	0.407	0.523	0.808	1.341	2.189
6			4	128.34	126.05	130.87	128.42	90.38	93.11	92.34	91.9433	110.34	102.82	104.32	105.827	89.44	116.27	93.28	99.6633	103.52	105.92	105.45	104.963
8			6	127.7	124.3	125.34	125.78	153.7	158.03	154.77	155.5	132.37	161	155.74	149.703	129.75	120.9	124.39	125.013	97.53	115.73	110.23	107.83
18			8	106.91	119.66	114.78	113.783	160.89	167.32	156.47	161.56	177.42	193.26	187.47	186.05	167.9	178.24	155.34	167.16	90.32	91.23	92.15	91.2333
			14	105.79	93.37	98.34	99.1667	81.52	110.15	93.48	95.05	77.55	83.83	80.34	80.5733	82.38	74.3	76.54	77.74	75.26	74.38	77.35	75.6633
		Concentration	Storage Time/d
		A1	B1	111.47	121.65	117.34
			B2	128.34	126.05	130.87
			B3	127.7	124.3	125.34
			B4	106.91	119.66	114.78
			B5	105.79	93.37	98.34
		A2	B1	103.45	102.34	90.34
			B2	90.38	93.11	92.34
			B3	153.7	158.03	154.77
			B4	160.89	167.32	156.47
			B5	81.52	110.15	93.48
		A3	B1	112.34	96.94	103.38
			B2	110.34	102.82	104.32
			B3	132.37	161	155.74
			B4	177.42	193.26	187.47
			B5	77.55	83.83	80.34
		A4	B1	94.39	99.67	94.92
			B2	89.44	116.27	93.28
			B3	129.75	120.9	124.39
			B4	167.9	178.24	155.34
			B5	82.38	74.3	76.54
		A5	B1	103.25	106.49	107.45
			B2	103.52	105.92	105.45
			B3	97.53	115.73	110.23
			B4	90.32	91.23	92.15
			B5	75.26	74.38	77.35

## Sheet: SOD enzyme activity
SODData		SOD（U/g Fresh Weight）		SOD（U/gFresh WEight）		SOD（U/gFresh Weight）		SOD（U/gFresh WEight）		SOD（U/gFresh Weight）				Storage Time/d	CK				S1				S2				S3				S4
Weight	CK①	395.82	459.103	658.72	654.663	554.9	551.7	680.09	637.04	645.67	556.793			0
	CK②	523.15		656.92		571.36		592.6		465.37				2	395.82	523.15	458.34	459.103	701.32	620.99	670.12	664.143	550.45	634	593.78	592.743	619.94	593.07	607.72	606.91	623.86	601.56	617.45	614.29
	CK③	458.34		648.35		528.84		638.43		559.34				4	658.72	656.92	648.35	654.663	534.85	553.3	537.82	541.99	589.36	728.42	677.28	665.02	647.32	641.67	659.38	649.457	531.61	592.5	577.39	567.167
Group p（Spray）	S1①	701.32	664.143	534.85	541.99	515.38	619.133	654.77	667.857	639.29	610.923			6	554.9	571.36	528.84	551.7	515.38	667.38	674.64	619.133	525.94	637.28	772.45	645.223	484.69	543.54	577.32	535.183	563.39	552.18	577.45	564.34
	S1②	620.99		553.3		667.38		663.89		619.84				8	680.09	592.6	638.43	637.04	654.77	663.89	684.91	667.857	1157.57	1273.79	1197.46	1209.61	1192.38	1394.76	1278.56	1288.57	888.75	832.45	790.37	837.19
	S1③	670.12		537.82		674.64		684.91		573.64				14	645.67	465.37	559.34	556.793	639.29	619.84	573.64	610.923	533.2	612.34	763.9	636.48	691.36	720.34	744.23	718.643	623.27	632.37	583.46	613.033
	S2①	550.45	592.743	589.36	665.02	525.94	645.223	1157.57	1209.61	533.2	636.48
	S2②	634		728.42		637.28		1273.79		612.34
	S2③	593.78		677.28		772.45		1197.46		763.9			concentration	Storage Time/d
	S3①	619.94	606.91	647.32	649.457	484.69	535.183	1192.38	1288.57	691.36	718.643		A1	B1	395.82	523.15	458.34
	S3②	593.07		641.67		543.54		1394.76		720.34				B2	658.72	656.92	648.35
	S3③	607.72		659.38		577.32		1278.56		744.23				B3	554.9	571.36	528.84
	S4①	623.86	614.29	531.61	567.167	563.39	557.785	888.75	837.19	623.27	613.033			B4	680.09	592.6	638.43
	S4②	601.56		592.5		552.18		832.45		632.37				B5	645.67	465.37	559.34
	S4③	617.45		577.39		577.45		790.37		583.46			A2	B1	701.32	620.99	670.12
														B2	534.85	553.3	537.82
														B3	515.38	667.38	674.64
														B4	654.77	663.89	684.91
														B5	639.29	619.84	573.64
													A3	B1	550.45	634	593.78
														B2	589.36	728.42	677.28
														B3	525.94	637.28	772.45
														B4	1157.57	1273.79	1197.46
														B5	533.2	612.34	763.9
													A4	B1	619.94	593.07	607.72
														B2	647.32	641.67	659.38
														B3	484.69	543.54	577.32
														B4	1192.38	1394.76	1278.56
														B5	691.36	720.34	744.23
													A5	B1	623.86	601.56	617.45
														B2	531.61	592.5	577.39
														B3	563.39	552.18	577.45
														B4	888.75	832.45	790.37
														B5	623.27	632.37	583.46

## Sheet: Residual chlorine dioxide
Storage Time/d	S1				S2				S3				S4
2	2.12	2.1	2.14	2.12	1.84	1.86	1.82	1.84	2.32	2.3	2.34	2.32	2.64	2.66	2.62	2.64
4	1.82	1.8	1.84	1.82	1.8	1.82	1.78	1.8	2.25	2.27	2.23	2.25	2.24	2.26	2.22	2.24
6	1.75	1.77	1.73	1.75	1.75	1.77	1.73	1.75	2.01	2.01	2.01	2.01	2.08	2.06	2.1	2.08
8	1.7	1.72	1.68	1.7	1.7	1.72	1.73	1.71667	1.89	1.87	1.91	1.89	1.85	1.83	1.87	1.85
14	1.69	1.66	1.67	1.67333	1.68	1.67	1.63	1.66	1.42	1.47	1.56	1.48333	1.81	1.83	1.79	1.81
	Concentration	Storage Time/d
S1	A1	B1	2.12	2.1	2.14
		B2	1.82	1.8	1.84
		B3	1.75	1.77	1.73
		B4	1.7	1.72	1.68
		B5	1.69	1.66	1.67
S2	A2	B1	1.84	1.86	1.82
		B2	1.8	1.82	1.78
		B3	1.75	1.77	1.73
		B4	1.7	1.72	1.73
		B5	1.68	1.67	1.63
S3	A3	B1	2.32	2.3	2.34
		B2	2.25	2.27	2.23
		B3	2.01	2.01	2.01
		B4	1.89	1.87	1.91
		B5	1.42	1.47	1.56
S4	A4	B1	2.64	2.66	2.62
		B2	2.24	2.26	2.22
		B3	2.08	2.06	2.1
		B4	1.85	1.83	1.87
		B5	1.81	1.83	1.79
